# Supplementary material
Source: PubMed Central journal article supplement (PMC3854955)
Supplement: NIHMS407233-supplement-Suppl_Table_S1.pdf [file NIHMS407233-supplement-Suppl_Table_S1.pdf]

**Supplemental Table 1:** GSA results for all analyzed pathways.

| KEGG pathway ID | KEGG pathway name                 | N genes | N SNPs | Gene-set association p-value |                      |                 |                    |
|-----------------|-----------------------------------|---------|--------|------------------------------|----------------------|-----------------|--------------------|
|                 |                                   |         |        | GM <sub>0.1</sub>            | PC-GM <sub>0.1</sub> | GM <sub>1</sub> | PC-GM <sub>1</sub> |
|                 | Synthesis and degradation of      |         |        |                              |                      |                 |                    |
| 72              | ketone bodies                     | 9       | 128    | 0.051                        | <b>0.003</b>         | 0.086           | <b>0.0009</b>      |
| 3320            | PPAR signaling pathway            | 69      | 1377   | <b>0.042</b>                 | <b>0.004</b>         | 0.1             | <b>0.034</b>       |
| 4260            | Cardiac muscle contraction        | 80      | 2667   | 0.186                        | <b>0.011</b>         | 0.174           | <b>0.025</b>       |
| 4520            | Adherens junction                 | 77      | 4063   | 0.154                        | <b>0.012</b>         | 0.132           | <b>0.014</b>       |
| 3410            | Base excision repair              | 35      | 487    | 0.06                         | <b>0.015</b>         | <b>0.015</b>    | <b>0.007</b>       |
| 5414            | Dilated cardiomyopathy            | 92      | 5405   | 0.71                         | <b>0.019</b>         | 0.764           | 0.199              |
| 910             | Nitrogen metabolism               | 23      | 359    | <b>0.016</b>                 | <b>0.02</b>          | <b>0.031</b>    | <b>0.011</b>       |
|                 | Hypertrophic cardiomyopathy       |         |        |                              |                      |                 |                    |
| 5410            | (HCM)                             | 89      | 5006   | 0.591                        | <b>0.02</b>          | 0.641           | 0.265              |
| 511             | Other glycan degradation          | 16      | 193    | 0.077                        | <b>0.023</b>         | 0.225           | 0.091              |
| 4320            | Dorso-ventral axis formation      | 25      | 987    | <b>0.016</b>                 | <b>0.025</b>         | <b>0.022</b>    | 0.055              |
| 650             | Butanoate metabolism              | 34      | 560    | 0.438                        | <b>0.035</b>         | 0.659           | 0.167              |
|                 | Neuroactive ligand-receptor       |         |        |                              |                      |                 |                    |
| 4080            | interaction                       | 302     | 8682   | <b>0.008</b>                 | 0.073                | <b>0.008</b>    | <b>0.022</b>       |
| 4740            | Olfactory transduction            | 389     | 3513   | 0.344                        | 0.073                | 0.332           | 0.188              |
| 3060            | Protein export                    | 9       | 114    | 0.288                        | 0.081                | 0.214           | 0.264              |
| 4340            | Hedgehog signaling pathway        | 56      | 1302   | 0.261                        | 0.085                | 0.23            | <b>0.05</b>        |
| 3420            | Nucleotide excision repair        | 44      | 727    | 0.101                        | 0.088                | 0.107           | 0.055              |
| 100             | Steroid biosynthesis              | 17      | 253    | <b>0.023</b>                 | 0.09                 | <b>0.02</b>     | <b>0.034</b>       |
| 3440            | Homologous recombination          | 28      | 653    | 0.203                        | 0.092                | 0.194           | 0.117              |
| 4514            | Cell adhesion molecules (CAMs)    | 134     | 6142   | 0.068                        | 0.096                | 0.097           | 0.054              |
| 620             | Pyruvate metabolism               | 40      | 833    | 0.402                        | 0.102                | 0.545           | 0.199              |
| 5110            | Vibrio cholerae infection         | 56      | 1428   | 0.75                         | 0.103                | 0.794           | 0.2                |
| 680             | Methane metabolism                | 6       | 139    | 0.334                        | 0.108                | 0.695           | 0.134              |
| 4110            | Cell cycle                        | 128     | 2154   | <b>0.01</b>                  | 0.11                 | <b>0.035</b>    | 0.072              |
| 310             | Lysine degradation                | 44      | 835    | 0.231                        | 0.116                | 0.227           | 0.345              |
| 4810            | Regulation of actin cytoskeleton  | 216     | 6849   | 0.265                        | 0.129                | 0.058           | <b>0.021</b>       |
| 920             | Sulfur metabolism                 | 13      | 621    | 0.775                        | 0.129                | 0.805           | 0.142              |
|                 | Glycosphingolipid biosynthesis -  |         |        |                              |                      |                 |                    |
| 601             | lacto and neolacto series         | 26      | 527    | <b>0.017</b>                 | 0.133                | <b>0.006</b>    | <b>0.04</b>        |
|                 | SNARE interactions in vesicular   |         |        |                              |                      |                 |                    |
| 4130            | transport                         | 38      | 762    | 0.379                        | 0.134                | 0.446           | 0.244              |
|                 | Amino sugar and nucleotide sugar  |         |        |                              |                      |                 |                    |
| 520             | metabolism                        | 44      | 942    | <b>0.045</b>                 | 0.137                | 0.089           | 0.446              |
| 240             | Pyrimidine metabolism             | 98      | 2047   | 0.253                        | 0.141                | 0.21            | <b>0.028</b>       |
| 5020            | Prion diseases                    | 35      | 939    | 0.182                        | 0.148                | 0.457           | 0.127              |
|                 | Glycosphingolipid biosynthesis -  |         |        |                              |                      |                 |                    |
| 603             | globo series                      | 14      | 334    | <b>0.037</b>                 | 0.159                | <b>0.03</b>     | 0.112              |
| 3430            | Mismatch repair                   | 23      | 459    | 0.107                        | 0.16                 | 0.281           | 0.284              |
| 4530            | Tight junction                    | 134     | 6157   | 0.512                        | 0.165                | 0.398           | 0.308              |
| 3010            | Ribosome                          | 88      | 546    | 0.347                        | 0.178                | 0.47            | 0.22               |
| 5220            | Chronic myeloid leukemia          | 75      | 1949   | 0.312                        | 0.179                | 0.171           | 0.073              |
| 5212            | Pancreatic cancer                 | 72      | 1857   | 0.534                        | 0.203                | 0.288           | 0.105              |
| 4660            | T cell receptor signaling pathway | 108     | 2989   | 0.291                        | 0.208                | 0.181           | 0.146              |
| 4020            | Calcium signaling pathway         | 178     | 8062   | 0.254                        | 0.211                | 0.118           | 0.138              |

|      |                                                                       |     |      |              |       |              |       |
|------|-----------------------------------------------------------------------|-----|------|--------------|-------|--------------|-------|
| 4512 | ECM-receptor interaction                                              | 84  | 3716 | 0.656        | 0.213 | 0.677        | 0.285 |
| 514  | O-Mannosyl glycan biosynthesis<br>Epithelial cell signaling in        | 3   | 62   | 0.221        | 0.214 | 0.108        | 0.15  |
| 5120 | Helicobacter pylori infection                                         | 68  | 1538 | 0.524        | 0.216 | 0.463        | 0.207 |
| 533  | Keratan sulfate biosynthesis                                          | 16  | 377  | 0.169        | 0.217 | 0.137        | 0.137 |
| 3018 | RNA degradation                                                       | 59  | 907  | 0.474        | 0.228 | 0.517        | 0.366 |
| 4940 | Type I diabetes mellitus                                              | 44  | 1175 | 0.068        | 0.229 | 0.094        | 0.347 |
| 3020 | RNA polymerase                                                        | 29  | 390  | 0.274        | 0.232 | 0.208        | 0.116 |
| 360  | Phenylalanine metabolism                                              | 22  | 337  | <b>0.004</b> | 0.235 | 0.069        | 0.34  |
| 140  | Steroid hormone biosynthesis<br>Progesterone-mediated oocyte          | 55  | 1925 | 0.878        | 0.239 | 0.73         | 0.614 |
| 4914 | maturation<br>Fatty acid elongation in                                | 86  | 2679 | 0.493        | 0.244 | 0.39         | 0.133 |
| 62   | mitochondria<br>Alanine aspartate and glutamate                       | 8   | 122  | 0.301        | 0.25  | 0.321        | 0.387 |
| 250  | metabolism                                                            | 31  | 629  | 0.5          | 0.256 | 0.873        | 0.605 |
| 330  | Arginine and proline metabolism                                       | 54  | 709  | 0.356        | 0.257 | 0.244        | 0.384 |
| 565  | Ether lipid metabolism                                                | 36  | 709  | 0.373        | 0.262 | 0.213        | 0.135 |
| 790  | Folate biosynthesis                                                   | 11  | 154  | 0.608        | 0.268 | 0.42         | 0.282 |
| 564  | Glycerophospholipid metabolism                                        | 69  | 1645 | 0.406        | 0.27  | 0.53         | 0.245 |
| 561  | Glycerolipid metabolism                                               | 45  | 1387 | 0.385        | 0.273 | 0.54         | 0.485 |
| 3050 | Proteasome                                                            | 48  | 592  | 0.178        | 0.278 | 0.134        | 0.318 |
| 4350 | TGF-beta signaling pathway<br>Complement and coagulation              | 87  | 1754 | 0.576        | 0.291 | 0.683        | 0.373 |
| 4610 | ascades<br>Cysteine and methionine                                    | 69  | 1390 | 0.704        | 0.291 | 0.721        | 0.55  |
| 270  | metabolism<br>Fc gamma R-mediated                                     | 34  | 595  | 0.536        | 0.295 | 0.193        | 0.143 |
| 4666 | phagocytosis                                                          | 97  | 3294 | 0.061        | 0.32  | 0.054        | 0.108 |
| 4930 | Type II diabetes mellitus                                             | 47  | 1935 | 0.294        | 0.321 | 0.463        | 0.517 |
| 4144 | Endocytosis                                                           | 187 | 5235 | 0.26         | 0.327 | <b>0.041</b> | 0.109 |
| 590  | Arachidonic acid metabolism                                           | 58  | 1153 | 0.33         | 0.329 | 0.168        | 0.444 |
| 532  | Chondroitin sulfate biosynthesis                                      | 22  | 1208 | 0.863        | 0.341 | 0.86         | 0.258 |
| 640  | Propanoate metabolism<br>Biosynthesis of unsaturated fatty            | 33  | 902  | 0.819        | 0.341 | 0.767        | 0.441 |
| 1040 | acids                                                                 | 22  | 476  | 0.643        | 0.352 | 0.65         | 0.24  |
| 4620 | Toll-like receptor signaling pathway<br>Valine leucine and isoleucine | 101 | 1524 | 0.275        | 0.353 | 0.312        | 0.263 |
| 280  | degradation<br>Porphyrin and chlorophyll                              | 44  | 994  | 0.504        | 0.362 | 0.391        | 0.313 |
| 860  | metabolism                                                            | 41  | 1476 | 0.57         | 0.363 | 0.681        | 0.605 |
| 4210 | Apoptosis                                                             | 88  | 1820 | <b>0.033</b> | 0.372 | 0.056        | 0.243 |
| 300  | Lysine biosynthesis                                                   | 4   | 75   | 0.443        | 0.372 | 0.291        | 0.308 |
| 380  | Tryptophan metabolism<br>Metabolism of xenobiotics by                 | 40  | 837  | <b>0.024</b> | 0.378 | 0.091        | 0.487 |
| 980  | cytochrome P450                                                       | 70  | 2005 | 0.876        | 0.384 | 0.753        | 0.687 |
| 5210 | Colorectal cancer                                                     | 85  | 2645 | 0.594        | 0.389 | 0.325        | 0.421 |
| 5322 | Systemic lupus erythematosus<br>Cytokine-cytokine receptor            | 140 | 1860 | 0.158        | 0.394 | 0.164        | 0.226 |
| 4060 | interaction                                                           | 278 | 4254 | 0.166        | 0.395 | 0.093        | 0.346 |
| 3022 | Basal transcription factors                                           | 38  | 583  | 0.694        | 0.395 | 0.836        | 0.916 |

|                                          |     |      |              |       |              |       |
|------------------------------------------|-----|------|--------------|-------|--------------|-------|
| 5014 Amyotrophic lateral sclerosis (ALS) | 53  | 1671 | 0.109        | 0.398 | <b>0.039</b> | 0.142 |
| Leukocyte transendothelial               |     |      |              |       |              |       |
| 4670 migration                           | 118 | 3811 | 0.452        | 0.405 | 0.398        | 0.075 |
| Vascular smooth muscle                   |     |      |              |       |              |       |
| 4270 contraction                         | 125 | 5555 | 0.965        | 0.405 | 0.895        | 0.513 |
| 562 Inositol phosphate metabolism        | 54  | 2147 | 0.99         | 0.405 | 0.968        | 0.795 |
| 5213 Endometrial cancer                  | 52  | 2505 | 0.476        | 0.41  | 0.395        | 0.348 |
| Phosphatidylinositol signaling           |     |      |              |       |              |       |
| 4070 system                              | 76  | 3675 | 0.987        | 0.415 | 0.985        | 0.868 |
| 52 Galactose metabolism                  | 26  | 603  | 0.058        | 0.421 | 0.07         | 0.465 |
| 534 Heparan sulfate biosynthesis         | 26  | 1103 | 0.818        | 0.424 | 0.636        | 0.269 |
| 770 Pantothenate and CoA biosynthesis    | 15  | 816  | 0.401        | 0.426 | 0.491        | 0.24  |
| 10 Glycolysis / Gluconeogenesis          | 62  | 1030 | 0.622        | 0.446 | 0.334        | 0.378 |
| 51 Fructose and mannose metabolism       | 34  | 866  | 0.103        | 0.46  | 0.063        | 0.367 |
| 340 Histidine metabolism                 | 29  | 541  | <b>0.012</b> | 0.461 | 0.077        | 0.425 |
| 2010 ABC transporters                    | 44  | 2362 | 0.504        | 0.472 | 0.506        | 0.612 |
| Maturity onset diabetes of the           |     |      |              |       |              |       |
| 4950 young                               | 25  | 359  | 0.959        | 0.473 | 0.927        | 0.858 |
| 5219 Bladder cancer                      | 42  | 894  | 0.809        | 0.49  | 0.386        | 0.319 |
| 5416 Viral myocarditis                   | 73  | 2768 | 0.725        | 0.49  | 0.773        | 0.783 |
| Arrhythmogenic right ventricular         |     |      |              |       |              |       |
| 5412 cardiomyopathy (ARVC)               | 76  | 6053 | 0.776        | 0.492 | 0.777        | 0.796 |
| 5221 Acute myeloid leukemia              | 60  | 1509 | 0.225        | 0.493 | 0.178        | 0.39  |
| 5340 Primary immunodeficiency            | 35  | 502  | 0.096        | 0.507 | 0.087        | 0.444 |
| 4662 B cell receptor signaling pathway   | 75  | 2192 | 0.293        | 0.509 | 0.174        | 0.286 |
| 3040 Spliceosome                         | 128 | 1396 | 0.842        | 0.514 | 0.782        | 0.556 |
| 4330 Notch signaling pathway             | 47  | 1160 | 0.743        | 0.514 | 0.856        | 0.623 |
| 970 Aminoacyl-tRNA biosynthesis          | 41  | 944  | 0.519        | 0.515 | 0.696        | 0.473 |
| 4360 Axon guidance                       | 129 | 6537 | 0.544        | 0.517 | 0.382        | 0.261 |
| 785 Lipoic acid metabolism               | 3   | 24   | 0.641        | 0.52  | 0.73         | 0.489 |
| 450 Selenoamino acid metabolism          | 26  | 393  | 0.863        | 0.528 | 0.888        | 0.852 |
| 4720 Long-term potentiation              | 70  | 4033 | 0.166        | 0.533 | 0.08         | 0.315 |
| 4142 Lysosome                            | 117 | 1973 | 0.608        | 0.534 | 0.584        | 0.336 |
| RIG-I-like receptor signaling            |     |      |              |       |              |       |
| 4622 pathway                             | 71  | 842  | 0.935        | 0.535 | 0.845        | 0.458 |
| 5217 Basal cell carcinoma                | 55  | 1104 | 0.679        | 0.541 | 0.621        | 0.515 |
| 900 Terpenoid backbone biosynthesis      | 15  | 223  | 0.603        | 0.549 | 0.506        | 0.57  |
| Natural killer cell mediated             |     |      |              |       |              |       |
| 4650 cytotoxicity                        | 141 | 2804 | 0.345        | 0.561 | 0.232        | 0.308 |
| 4114 Oocyte meiosis                      | 114 | 3244 | 0.555        | 0.564 | 0.332        | 0.238 |
| NOD-like receptor signaling              |     |      |              |       |              |       |
| 4621 pathway                             | 62  | 907  | 0.986        | 0.568 | 0.942        | 0.804 |
| 5222 Small cell lung cancer              | 84  | 3549 | 0.56         | 0.571 | 0.393        | 0.553 |
| 4920 Adipocytokine signaling pathway     | 67  | 1642 | 0.244        | 0.579 | 0.145        | 0.401 |
| 230 Purine metabolism                    | 157 | 5506 | 0.427        | 0.59  | 0.387        | 0.235 |
| Nicotinate and nicotinamide              |     |      |              |       |              |       |
| 760 metabolism                           | 24  | 528  | 0.387        | 0.594 | 0.427        | 0.448 |
| 4012 ErbB signaling pathway              | 87  | 3884 | 0.265        | 0.596 | <b>0.048</b> | 0.367 |

|                                      |      |       |       |       |              |       |
|--------------------------------------|------|-------|-------|-------|--------------|-------|
| Glycosphingolipid biosynthesis -     |      |       |       |       |              |       |
| 604 ganglio series                   | 20   | 725   | 0.759 | 0.597 | 0.753        | 0.789 |
| 4510 Focal adhesion                  | 201  | 7682  | 0.66  | 0.598 | 0.469        | 0.565 |
| 4115 p53 signaling pathway           | 69   | 1129  | 0.072 | 0.605 | 0.232        | 0.385 |
| 5330 Allograft rejection             | 38   | 665   | 0.279 | 0.609 | 0.21         | 0.528 |
| 5332 Graft-versus-host disease       | 42   | 643   | 0.305 | 0.61  | 0.259        | 0.605 |
| 5016 Huntington's disease            | 185  | 3669  | 0.396 | 0.613 | 0.617        | 0.69  |
| 4010 MAPK signaling pathway          | 273  | 8509  | 0.302 | 0.616 | <b>0.029</b> | 0.188 |
| 4120 Ubiquitin mediated proteolysis  | 138  | 3396  | 0.821 | 0.621 | 0.553        | 0.383 |
| 5310 Asthma                          | 30   | 500   | 0.205 | 0.621 | 0.131        | 0.48  |
| 4640 Hematopoietic cell lineage      | 88   | 1588  | 0.684 | 0.621 | 0.44         | 0.545 |
| 5012 Parkinson's disease             | 133  | 1804  | 0.767 | 0.648 | 0.562        | 0.732 |
| Valine leucine and isoleucine        |      |       |       |       |              |       |
| 290 biosynthesis                     | 11   | 269   | 0.419 | 0.654 | 0.438        | 0.536 |
| 903 Limonene and pinene degradation  | 14   | 157   | 0.596 | 0.659 | 0.439        | 0.64  |
| 4623 Cytosolic DNA-sensing pathway   | 56   | 533   | 0.759 | 0.662 | 0.634        | 0.413 |
| 3030 DNA replication                 | 36   | 567   | 0.363 | 0.665 | 0.448        | 0.634 |
| Glyoxylate and dicarboxylate         |      |       |       |       |              |       |
| 630 metabolism                       | 16   | 398   | 0.261 | 0.666 | 0.355        | 0.564 |
| Aldosterone-regulated sodium         |      |       |       |       |              |       |
| 4960 reabsorption                    | 42   | 1147  | 0.711 | 0.673 | 0.687        | 0.567 |
| 5216 Thyroid cancer                  | 29   | 841   | 0.895 | 0.679 | 0.833        | 0.535 |
| 592 alpha-Linolenic acid metabolism  | 19   | 284   | 0.686 | 0.682 | 0.264        | 0.463 |
| Antigen processing and               |      |       |       |       |              |       |
| 4612 presentation                    | 89   | 1010  | 0.187 | 0.688 | 0.063        | 0.478 |
| 30 Pentose phosphate pathway         | 27   | 447   | 0.667 | 0.692 | 0.683        | 0.739 |
| 5218 Melanoma                        | 71   | 2219  | 0.308 | 0.696 | 0.137        | 0.452 |
| 3450 Non-homologous end-joining      | 14   | 262   | 0.857 | 0.699 | 0.907        | 0.664 |
| 4630 Jak-STAT signaling pathway      | 155  | 2570  | 0.144 | 0.704 | 0.059        | 0.243 |
| 5215 Prostate cancer                 | 89   | 2496  | 0.659 | 0.712 | 0.387        | 0.533 |
| 480 Glutathione metabolism           | 50   | 569   | 0.798 | 0.712 | 0.713        | 0.601 |
| Pentose and glucuronate              |      |       |       |       |              |       |
| 40 interconversions                  | 28   | 1337  | 0.82  | 0.715 | 0.777        | 0.688 |
| Drug metabolism - cytochrome         |      |       |       |       |              |       |
| 982 P450                             | 72   | 2239  | 0.712 | 0.716 | 0.739        | 0.802 |
| 4310 Wnt signaling pathway           | 151  | 4179  | 0.776 | 0.732 | 0.46         | 0.305 |
| 53 Ascorbate and aldarate metabolism |      |       |       |       |              |       |
| 4912 GnRH signaling pathway          | 101  | 3859  | 0.868 | 0.745 | 0.611        | 0.585 |
| 740 Riboflavin metabolism            | 16   | 342   | 0.17  | 0.745 | 0.358        | 0.866 |
| 4150 mTOR signaling pathway          | 52   | 1409  | 0.331 | 0.758 | 0.227        | 0.655 |
| 500 Starch and sucrose metabolism    | 52   | 1940  | 0.697 | 0.758 | 0.579        | 0.718 |
| 780 Biotin metabolism                | 2    | 99    | 0.839 | 0.766 | 0.786        | 0.767 |
| 190 Oxidative phosphorylation        | 135  | 1358  | 0.555 | 0.774 | 0.327        | 0.479 |
| 4140 Regulation of autophagy         | 35   | 368   | 0.451 | 0.774 | 0.673        | 0.713 |
| 1100 Metabolic pathways              | 1104 | 24490 | 0.836 | 0.774 | 0.781        | 0.796 |
| 4664 Fc epsilon RI signaling pathway | 79   | 2494  | 0.495 | 0.775 | 0.348        | 0.528 |
| 410 beta-Alanine metabolism          | 22   | 919   | 0.852 | 0.777 | 0.896        | 0.908 |
| 5200 Pathways in cancer              | 330  | 10613 | 0.853 | 0.781 | 0.596        | 0.745 |
| 20 Citrate cycle (TCA cycle)         | 32   | 550   | 0.215 | 0.782 | 0.063        | 0.408 |
| Glycosylphosphatidylinositol(GPI)-   |      |       |       |       |              |       |
| 563 anchor biosynthesis              | 25   | 403   | 0.391 | 0.782 | 0.49         | 0.804 |

|                                     |     |      |       |       |       |       |
|-------------------------------------|-----|------|-------|-------|-------|-------|
| 5320 Autoimmune thyroid disease     | 53  | 975  | 0.522 | 0.785 | 0.399 | 0.701 |
| 5214 Glioma                         | 65  | 2015 | 0.282 | 0.789 | 0.132 | 0.57  |
| 5010 Alzheimer's disease            | 169 | 4346 | 0.534 | 0.789 | 0.442 | 0.765 |
| 4370 VEGF signaling pathway         | 76  | 1800 | 0.552 | 0.799 | 0.214 | 0.373 |
| 4730 Long-term depression           | 70  | 3992 | 0.791 | 0.802 | 0.666 | 0.517 |
| D-Arginine and D-ornithine          |     |      |       |       |       |       |
| 472 metabolism                      | 1   | 14   | 0.8   | 0.803 | 0.767 | 0.803 |
| 600 Sphingolipid metabolism         | 40  | 718  | 0.896 | 0.808 | 0.77  | 0.552 |
| 5211 Renal cell carcinoma           | 70  | 1810 | 0.346 | 0.811 | 0.135 | 0.646 |
| Intestinal immune network for IgA   |     |      |       |       |       |       |
| 4672 production                     | 48  | 824  | 0.371 | 0.814 | 0.317 | 0.788 |
| 510 N-Glycan biosynthesis           | 46  | 1135 | 0.997 | 0.815 | 1     | 0.951 |
| Pathogenic Escherichia coli         |     |      |       |       |       |       |
| 5130 infection                      | 59  | 1020 | 0.562 | 0.824 | 0.631 | 0.555 |
| 5223 Non-small cell lung cancer     | 54  | 2469 | 0.555 | 0.827 | 0.277 | 0.731 |
| 61 Fatty acid biosynthesis          | 6   | 212  | 0.992 | 0.841 | 0.995 | 0.968 |
| 4614 Renin-angiotensin system       | 17  | 309  | 0.849 | 0.843 | 0.772 | 0.736 |
| 71 Fatty acid metabolism            | 42  | 721  | 0.89  | 0.85  | 0.769 | 0.99  |
| 591 Linoleic acid metabolism        | 29  | 494  | 0.77  | 0.862 | 0.408 | 0.746 |
| 983 Drug metabolism - other enzymes | 51  | 2245 | 0.959 | 0.87  | 0.938 | 0.888 |
| 4742 Taste transduction             | 52  | 1518 | 0.512 | 0.879 | 0.772 | 0.945 |
| 4146 Peroxisome                     | 78  | 1266 | 0.429 | 0.896 | 0.618 | 0.755 |
| Glycine serine and threonine        |     |      |       |       |       |       |
| 260 metabolism                      | 31  | 497  | 0.887 | 0.896 | 0.941 | 0.98  |
| 350 Tyrosine metabolism             | 46  | 910  | 0.267 | 0.913 | 0.534 | 0.97  |
| 830 Retinol metabolism              | 64  | 1893 | 0.963 | 0.914 | 0.83  | 0.946 |
| 120 Primary bile acid biosynthesis  | 16  | 438  | 0.953 | 0.917 | 0.821 | 0.945 |
| 531 Glycosaminoglycan degradation   | 21  | 595  | 0.232 | 0.925 | 0.312 | 0.935 |
| 4540 Gap junction                   | 90  | 4042 | 0.928 | 0.933 | 0.839 | 0.796 |
| 4710 Circadian rhythm - mammal      | 13  | 273  | 0.896 | 0.94  | 0.835 | 0.941 |
| 750 Vitamin B6 metabolism           | 6   | 156  | 0.802 | 0.945 | 0.795 | 0.901 |
| 4062 Chemokine signaling pathway    | 190 | 5233 | 0.627 | 0.946 | 0.292 | 0.667 |
| 4722 Neurotrophin signaling pathway | 126 | 3668 | 0.534 | 0.947 | 0.145 | 0.632 |
| 670 One carbon pool by folate       | 17  | 521  | 0.836 | 0.956 | 0.677 | 0.914 |
| D-Glutamine and D-glutamate         |     |      |       |       |       |       |
| 471 metabolism                      | 4   | 43   | 0.979 | 0.957 | 0.925 | 0.923 |
| 460 Cyanoamino acid metabolism      | 7   | 79   | 0.872 | 0.957 | 0.829 | 0.953 |
| 730 Thiamine metabolism             | 8   | 284  | 0.639 | 0.958 | 0.846 | 0.961 |
| 4910 Insulin signaling pathway      | 137 | 3427 | 0.601 | 0.959 | 0.434 | 0.872 |
| Ubiquinone and other terpenoid-     |     |      |       |       |       |       |
| 130 quinone biosynthesis            | 7   | 75   | 0.986 | 0.96  | 0.977 | 0.979 |
| 4916 Melanogenesis                  | 102 | 2979 | 0.954 | 0.97  | 0.861 | 0.86  |
| 232 Caffeine metabolism             | 7   | 175  | 0.937 | 0.974 | 0.948 | 0.962 |
| Taurine and hypotaurine             |     |      |       |       |       |       |
| 430 metabolism                      | 10  | 123  | 0.971 | 0.975 | 0.95  | 0.97  |
| 512 O-Glycan biosynthesis           | 30  | 1450 | 0.852 | 0.987 | 0.926 | 0.973 |
| Phenylalanine tyrosine and          |     |      |       |       |       |       |
| 400 tryptophan biosynthesis         | 5   | 100  | 0.994 | 0.991 | 0.956 | 0.985 |
